# Supplementary material for: A phased array based on large-area electronics that operates at gigahertz frequency
Source: Springer Nature journal article supplement (doi:10.1038/s41928-021-00648-z), 2021-10-07
Supplement: 41928_2021_648_MOESM1_ESM.pdf [file 41928_2021_648_MOESM1_ESM.pdf]

---

**Supplementary information**

---

**A phased array based on large-area electronics that operates at gigahertz frequency**

---

In the format provided by the authors and unedited

## **Supplementary Information**

### **A Phased Array based on Large-Area Electronics that Operates at Gigahertz Frequency**

Can Wu, Yoni Mehlman, Prakhar Kumar, Tiffany Moy, Hongyang Jia, Yue Ma, Sigurd Wagner,  
James C. Sturm and Naveen Verma\*

*Department of Electrical and Computer Engineering, Princeton University, Princeton, NJ, USA*

\*Correspondence to: [nverma@princeton.edu](mailto:nverma@princeton.edu)

# Supplementary Fig. 1

## Radiation patterns of near-field beam focus and far-field beam steering.

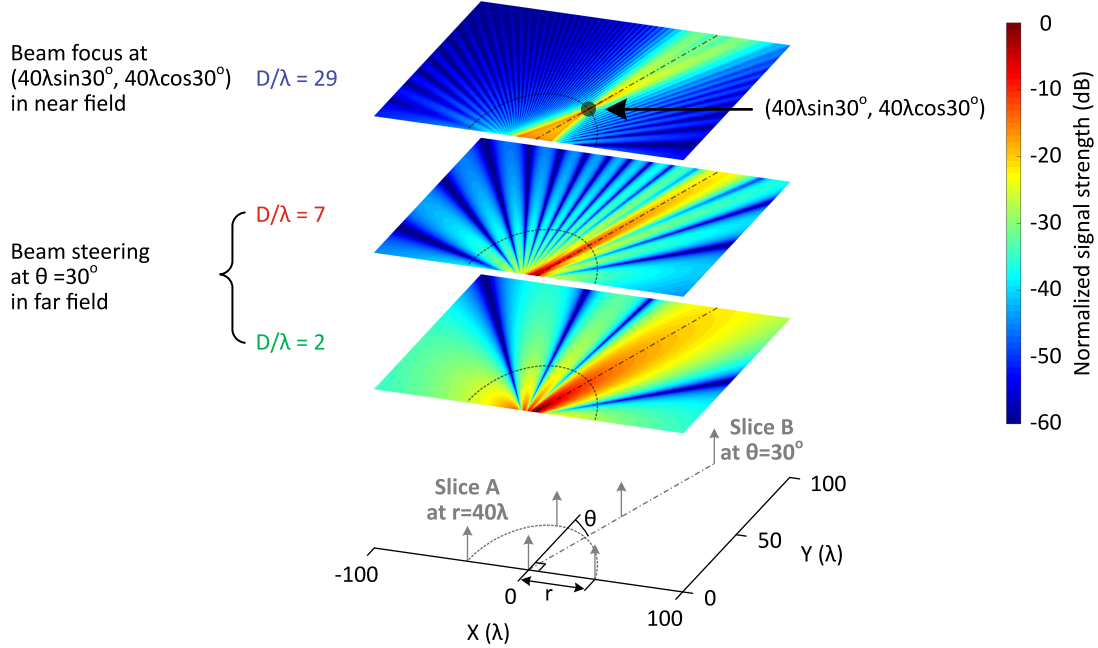

(a) 2D heat map of the modeled radiation patterns of a phased array with  $\lambda/2$  spacing between antennas and different  $D/\lambda$ 's. The signal strength is normalized by the number of antennas. In the two far-field cases (two plots at the bottom), the beam is steered to  $\theta = 30^\circ$ , by setting the phase of each antenna  $i$  to satisfy  $\Delta\phi_i - \Delta\phi_{i-1} = \pi \sin\theta$  (where  $\Delta\phi_i$  is the phase of the  $i^{\text{th}}$  antenna). In the near-field case (plot at the top), the beam is focused at  $(x = 40\lambda \sin 30^\circ, y = 40\lambda \cos 30^\circ)$ , by setting the phase of the  $i^{\text{th}}$  antenna to satisfy  $-\frac{\Delta\phi_i}{2\pi} \lambda + d_i = n\lambda$ , where  $d_i$  is the distance between the focus point and the  $i^{\text{th}}$  antenna, and  $n$  is an integer.

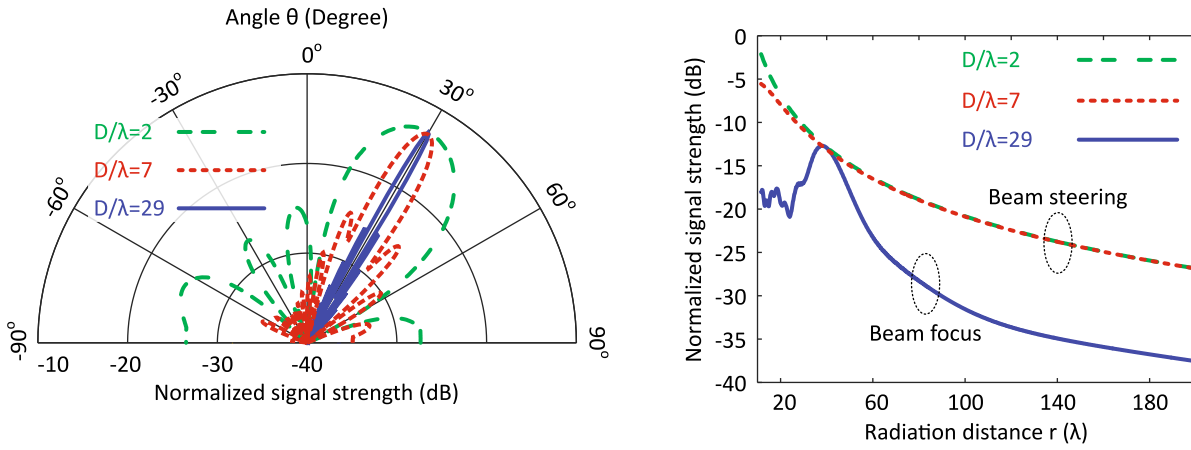

(b)

**(b) 1D slices of the 2D radiation patterns in (a). Left: the slice A along  $\theta$  when  $r = 40\lambda$ . Right: the slice B along  $r$  when  $\theta = 30^\circ$ .**



## Supplementary Fig. 2 Self-aligned patterning of TFT source/drain.

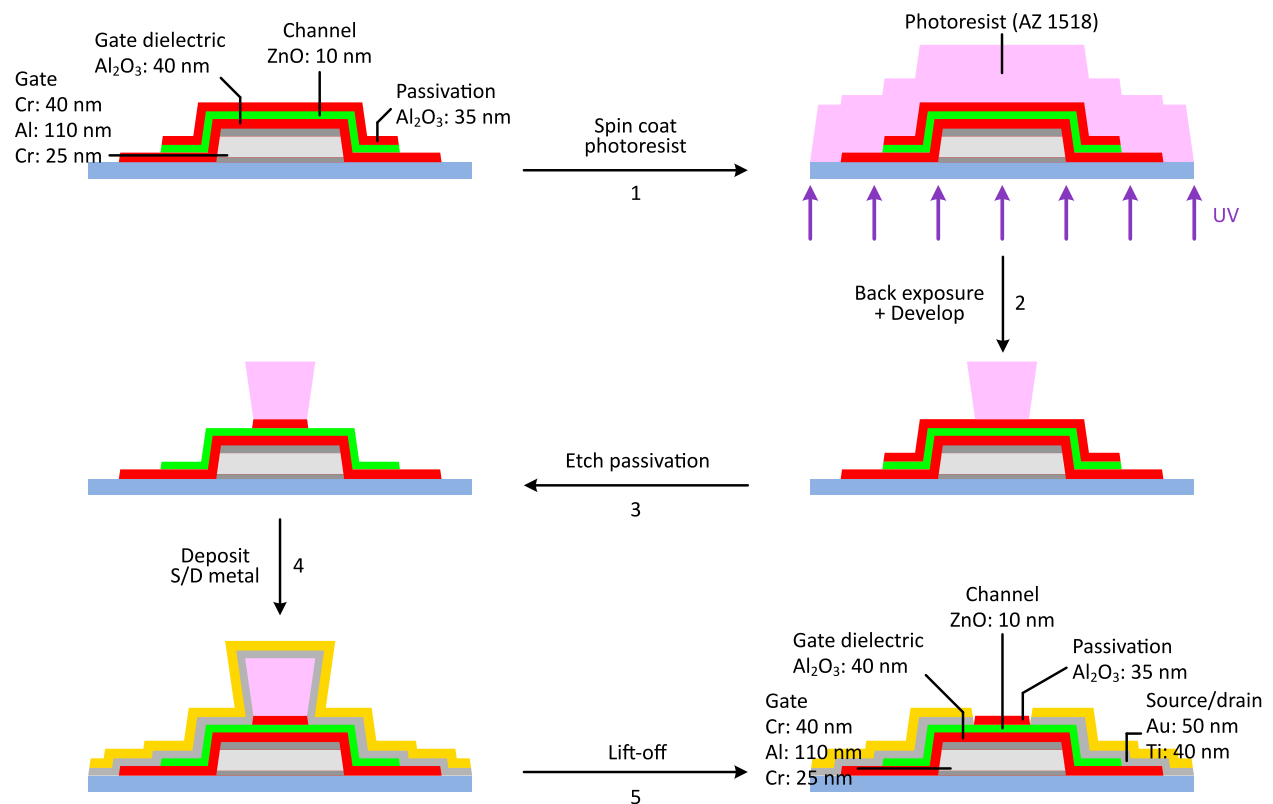

Start by patterning Cr/Al/Cr bottom gate electrode on a glass substrate. Cover the gate electrode with a stack of Al<sub>2</sub>O<sub>3</sub>/ZnO/Al<sub>2</sub>O<sub>3</sub> layers by plasma-enhanced atomic layer deposition (PEALD), which is then patterned as islands. Next, spin coat positive photoresist (AZ 1518) and illuminate with UV light at the wavelength of 365 nm from the backside. Because ZnO and Al<sub>2</sub>O<sub>3</sub> are transparent, all regions except above the gate electrode are exposed. Developing leaves photoresist only above the gate electrode. Etch away the passivating Al<sub>2</sub>O<sub>3</sub> from everywhere else and thermally evaporate Ti/Au (40 nm/50 nm) for source/drain contacts. Lift off the remaining photoresist and metal above the channel. The diffraction of the UV light leaves the channel slightly narrower than the gate electrode, leading to minimal overlap between gate and source/drain.

**Supplementary Fig. 3**  
**DC performance of ZnO TFTs and X-ray diffraction**  
**characterization of ZnO thin film.**

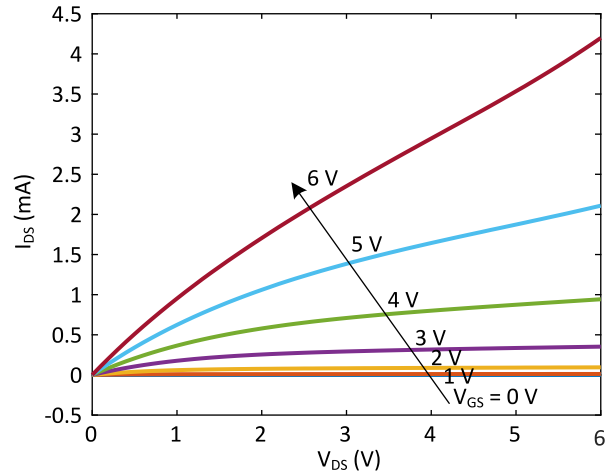

(a)  $I_{DS} - V_{DS}$  output curve of ZnO TFT with  $W_{TFT}/L_{TFT} = 150 \mu\text{m}/0.7 \mu\text{m}$ .

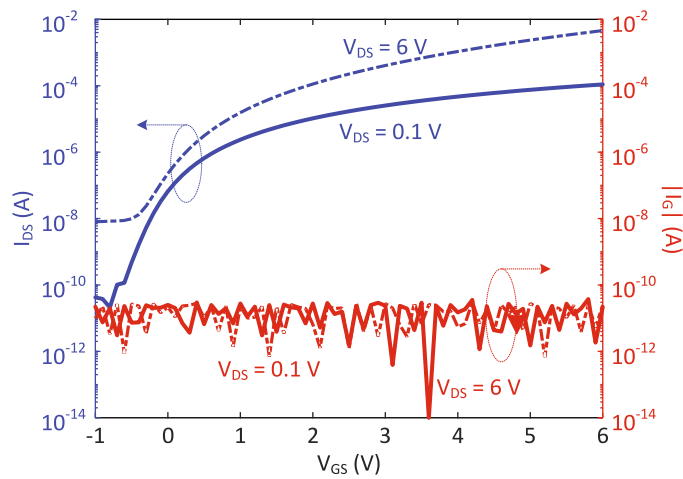

(b)  $I_{DS} - V_{GS}$  transfer curve and gate leakage of ZnO TFT with  $W_{TFT}/L_{TFT} = 150 \mu\text{m}/0.7 \mu\text{m}$ .

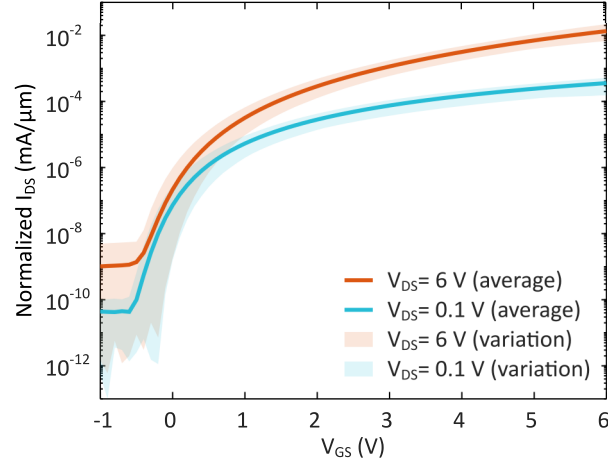

(c)  $I_{DS} - V_{GS}$  transfer curve across 50 ZnO TFTs with  $L_{TFT} \approx 1 \mu\text{m}$ . The solid line shows average while shaded region shows the maximum/minimum boundary. The field-effect mobility and threshold voltage are extracted to be  $11 \text{ cm}^2/\text{V}\cdot\text{s}$  and  $2.3 \text{ V}$  on average with standard deviations of  $3.8 \text{ cm}^2/\text{V}\cdot\text{s}$  and  $0.2 \text{ V}$ , respectively. They are extracted by extrapolation and from the slope of the  $\sqrt{I_{DS}} - V_{GS}$  curve in the saturation regime.

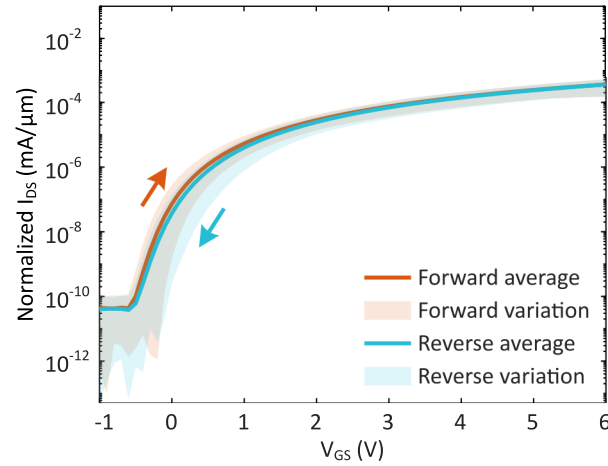

(d) Forward- and reverse-sweep of  $I_{DS} - V_{GS}$  across 50 ZnO TFTs with  $L_{TFT} \approx 1 \mu\text{m}$  at  $V_{DS} = 0.1 \text{ V}$ . The solid line shows average while shaded region shows the minimum/maximum boundary.

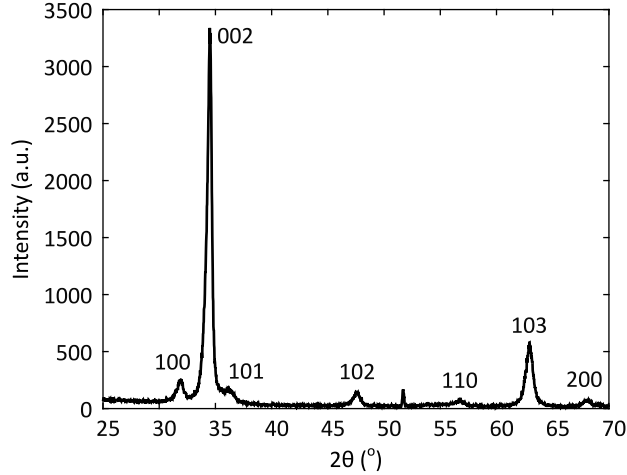

(e) **Measured X-Ray Diffraction (XRD) results for 100 nm-thick ZnO deposited by PEALD.** The grain size was estimated by Scherrer equation, to be  $d = \frac{K\lambda}{\beta \cos\theta} = 15 \text{ nm}$ , where  $K \approx 0.9$  is the shape factor,  $\beta = 0.57^\circ$  is the full width of half maximum at the 002 peak,  $\theta = 17.25^\circ$  is the Bragg angle at the 002 peak, and  $\lambda = 1.5406 \text{ \AA}$  is the wavelength of X-ray used. Because the grain size is much less than TFT channel dimensions, TFT variations are unlikely due to the polycrystalline nature of ZnO, and instead likely due to the variations in film thickness, electron mobility, and contact resistance.



## Supplementary Fig. 5 Analysis of loop inductor.

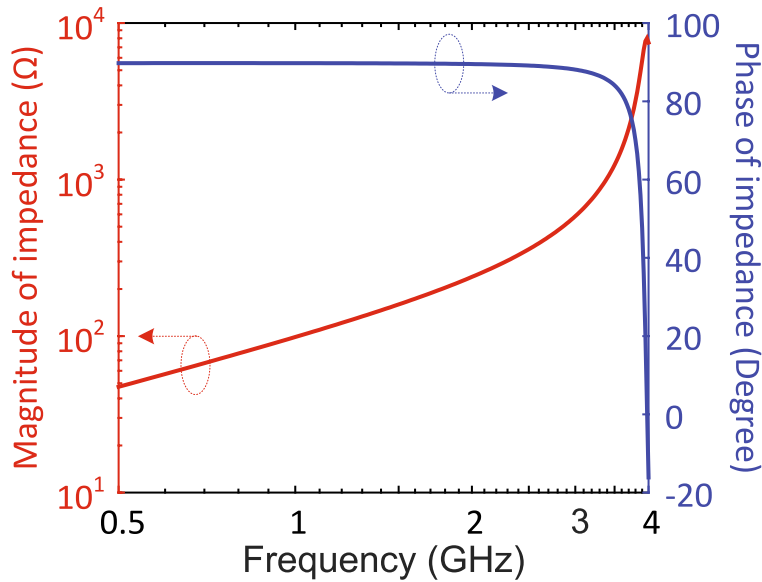

**(a) Simulated impedance of the loop inductor.** The 3D electromagnetic simulation was performed using Ansys HFSS. The inductor was made of 35- $\mu\text{m}$ -thick, 0.9-mm-wide, 4-mm-radius copper trace on PCB. The inductance is extracted at low frequencies to be 15 nH; the self-capacitance, calculated from the self-resonance frequency  $C_{SELF} = \frac{1}{\omega^2 L}$ , is 106 fF. These values correspond to an inductance of 7.5 nH and a capacitance of 212 fF for each branch of the differential oscillator.

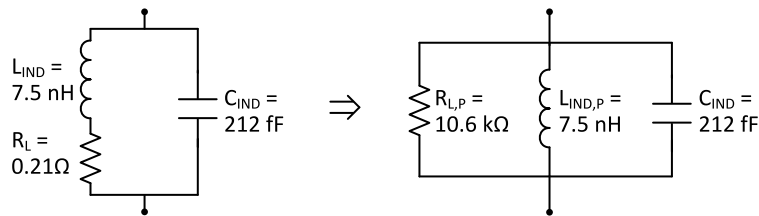

**(b) Circuit model of the loop inductor.** The parallel-to-series transformation is performed at 1 GHz.

## Supplementary Fig. 6 Analysis of LC cross-coupled oscillator with phase tunability.

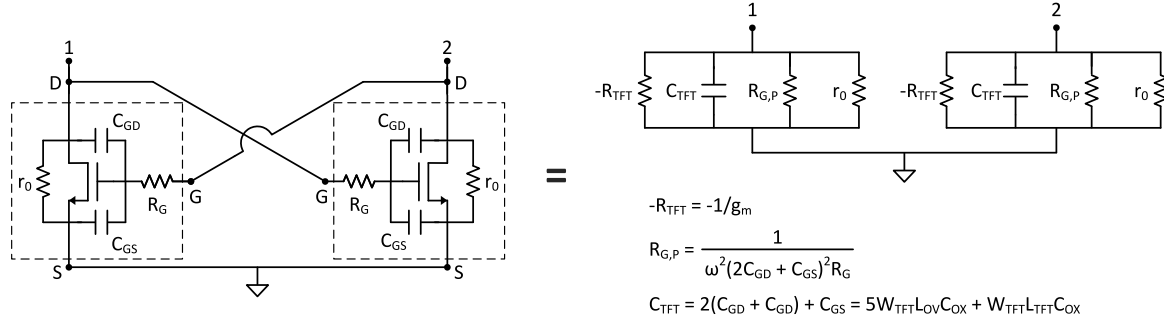

**(a) Analysis of cross-coupled TFTs.** **Left: circuit diagram of cross-coupled TFT pair with parasitics.**  $R_G$  is the resistance of the gate electrode.  $C_{GS}$  is a combination of gate-source overlap capacitance and gate-channel capacitance,  $C_{GS} = W_{TFT}L_{OV}C_{OX} + W_{TFT}L_{TFT}C_{OX} + C_{METAL}$ , where  $W_{TFT}$  is channel width,  $L_{TFT}$  is the channel length,  $L_{OV}$  is the overlap length,  $C_{OX}$  is the capacitance per unit area, and  $C_{METAL}$  is the capacitance due to the overlaps between different metal layers in the layout.  $C_{GD}$  is the gate-drain overlap capacitance,  $C_{GD} = W_{TFT}L_{OV}C_{OX}$ .  $r_0$  is the output resistance of the TFT in the saturation region. **Right: equivalent circuit of cross-coupled TFT pair.** By series-to-parallel transformation and vice versa, the circuit is translated into a parallel network at a fixed frequency of 1 GHz, which consists of: (1) a negative resistor  $-R_{TFT}$ ; (2) a capacitor  $C_{TFT}$  (the factor 2 for  $C_{GD}$  is due to the Miller effect); (3) a resistor  $R_{G,P}$ , representing gate resistance in the parallel network; and (4) a resistor  $r_0$ .

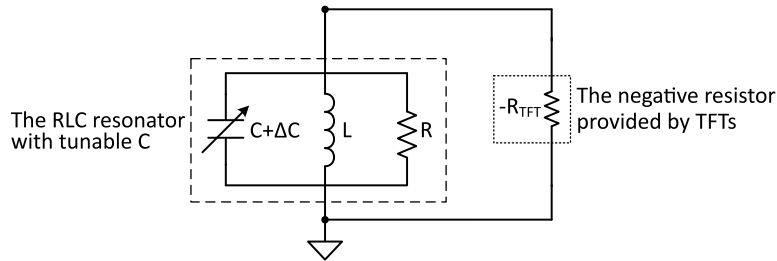

**(b) Conceptual diagram of LC cross-coupled oscillator.**

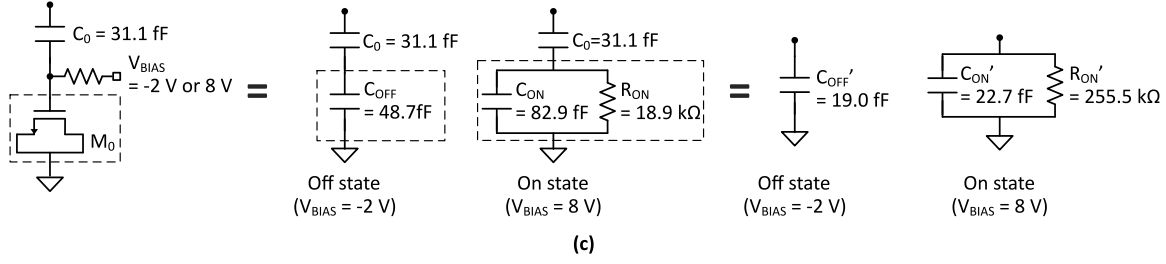

**(c) Model of capacitor bank.** The capacitor bank is binary-weighted; namely, the  $i$ th bit consists of  $2^i$  duplicates of the basic capacitance-tuning unit. As shown above, the unit is a tunable MOS-capacitor  $M_0$  in series with a fixed capacitor  $C_0$ . The fixed parallel-plate capacitor  $C_0$  is made with a 40 nm-thick  $\text{Al}_2\text{O}_3$  dielectric sandwiched between two metal pads with  $3 \mu\text{m} \times 3 \mu\text{m}$  overlap.  $C_0$  decouples the DC bias voltage from the oscillator. The MOS-capacitor  $M_0$  is a TFT whose  $W_{BANK}/L_{BANK}$  is  $30 \mu\text{m}/1 \mu\text{m}$ , with its source and drain shorted. Its capacitance is controlled by a digitalized DC bias voltage  $V_{BIAS}$  (Fig. 4d). At  $V_{BIAS} = -2 \text{ V}$ , the TFT is turned off; then the impedance of the MOS-capacitor  $M_0$  is purely capacitive due to gate-source/drain overlap, represented by a capacitor  $C_{OFF}$ . At  $V_{BIAS} = 8 \text{ V}$ , the TFT is turned on with its channel becoming conductive, thus an additional gate capacitance is introduced. Because of the finite conductance of the channel, the overall impedance is a mix of capacitance and resistance, represented by a parallel network of  $R_{ON}$  and  $C_{ON}$ . Therefore, at a fixed frequency of 1 GHz, by parallel-to-series transformation and vice versa, the impedance of the bank can be modeled as: (1)  $C_{OFF}'$  at  $V_{BIAS} = -2 \text{ V}$ ; (2) a parallel network of  $R_{ON}'$  and  $C_{ON}'$  at  $V_{BIAS} = 8 \text{ V}$ . The values listed in the circuits above were extracted from the measured data in Fig. 4d.



## Supplementary Fig. 7 Proposed integrated calibration architecture.

As mentioned, an integrated calibration mechanism will ultimately be needed to compensate for non-idealities such as device drift, temperature changes, manufacturing variations, etc. Calibration essentially involves two steps: phase detection and phase tuning. While demonstration of an integrated calibration mechanism is left as future work (namely exploring appropriate circuit topologies for phase detectors and shifters that are suited to the limited  $f_T$  of TFTs), an approach that can be adapted for future integrated systems is presented.

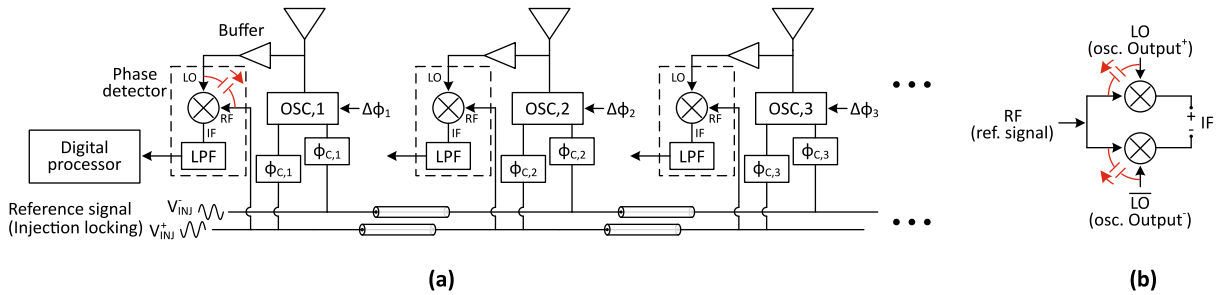

**(a) Proposed architecture for integrated calibration. (b) Differential implementation of the mixer to cancel LO-to-RF feedthrough.**

The proposed architecture is shown above. The phase error is measured by a detector, which converts the phase difference between a reference signal and each oscillator to a DC voltage, and then fed to a digital processor. Phase tuning is performed by inserting a fine-phase-tuning circuit between the reference signal and the oscillator, i.e.,  $\phi_{C,i}$  ( $i = 1, 2, 3, \dots$ ), controlled by the digital processor, in response to the phase error detected.

The phase detector can be realized by a mixer with a low-pass filter. Mixers are feasible using transistors or diodes, as previously demonstrated<sup>1,2</sup>. Particularly in LAE technology, high device parasitic capacitances are a concern, which create an unwanted local oscillator (LO) to RF feedthrough path (indicated by the coupling capacitor in red in **(a)**) and lead to self-mixing of the LO signal and offset of the DC output. To address this, as shown in **(b)**, a fully-differential implementation can be employed to cancel the parasitic

capacitive conduction paths<sup>3,4,5</sup>, taking advantage of the differential output available in the LC oscillator.

The phase shifter can be realized as switched transmission lines via RF switches. While a typical drawback of this approach is its large area, this is of reduced concern in LAE (compared to conventional technologies such as Si-CMOS). A key challenge, however, is the implementation of gigahertz RF switches. As shown in Fig. 1d, the  $f_T$  of TFTs is limited to well below 1 GHz<sup>†</sup>. One way to address this is through a resonant switch, employing an inductor in parallel with the TFT, to negate parasitic capacitances by taking advantage of high-quality-factor inductors possible in LAE thanks to large geometries as well as low-loss metal traces and substrates. While this trades off bandwidth, such a trade-off is often acceptable in phased arrays, employing a specific narrow frequency range for proper geometric construction of radiation patterns.

---

<sup>†</sup>The small-signal analysis of a TFT shows  $f_T = \frac{g_m}{2\pi(C_{GS}+C_{GD})}$ , where  $g_m$  is transconductance, and  $C_{GS}/C_{GD}$  is gate-to-source/drain capacitance. When a TFT is used as a switch, the cut-off frequency is  $\frac{1}{2\pi R_{ON}C_{GD}} \approx \frac{g_m}{2\pi C_{GD}}$ , where  $R_{ON}$  is its channel resistance while the TFT is turned on. As a result, the cut-off frequency of a TFT as switch is not exactly  $f_T$  but higher by a factor of  $(C_{GS} + C_{GD})/C_{GD} \approx 3$  (assuming channel length is 0.7  $\mu\text{m}$  and gate-to-source/drain overlap is 0.7  $\mu\text{m}$ , as in this work).

## Supplementary Fig. 8

### Simulation of an 8-element phased array (with ideal omnidirectional antennas).

A simulation of an 8-element phased array is performed to assess feasibility of scaling up the system. The non-idealities, such as device variations (extracted from the measurements of 8 individual elements) and losses in transmission lines are modeled in the simulation. Scaling-up from Fig. 2a, the 8-element architecture is shown in (b), pointing out the non-ideal factors considered. The capacitance, mobility, and threshold voltage variation with standard deviations of  $\sigma_c = 39 \text{ fF}$  (measured from eight oscillators built as shown in (a)),  $\sigma_\mu = 3.8 \text{ cm}^2/\text{V} \cdot \text{s}$  (from Supplementary Fig. 3c), and  $\sigma_{V_T} = 0.20 \text{ V}$  (from Supplementary Fig. 3c), and a loss of 1.8 dB/m at 1 GHz in the transmission lines (from EM simulation of a microstrip with  $50 \Omega$  characteristics impedance) are included.

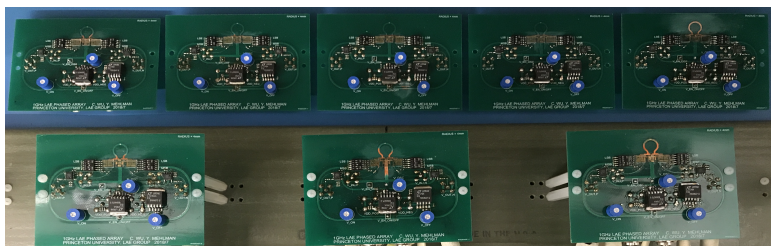

(a) Photograph of 8 phase-tunable oscillators built and measured.

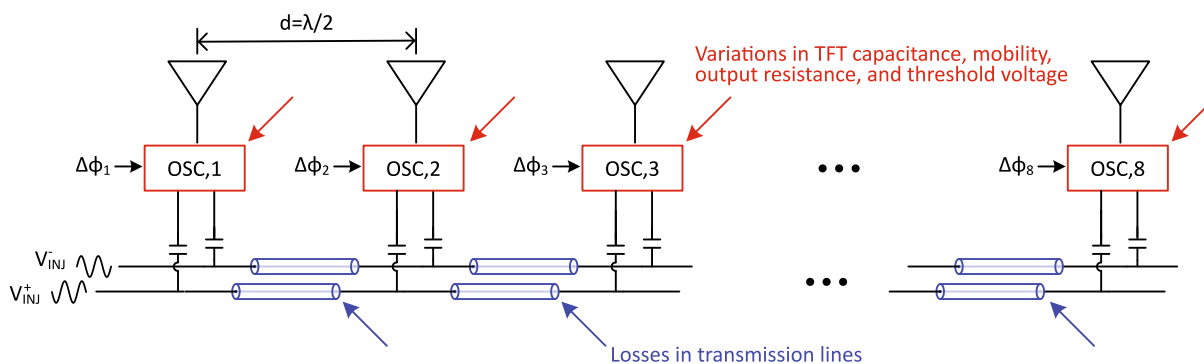

(b) Simulated 8-element system architecture with non-ideal factors noted.

Capacitor banks with 4-bit precision are used (Fig. 4b). To address the offset in phase due to the capacitance variation, two redundant bits (of equal MSB weight) are used to counter variation in the free-running frequency of the oscillators. To steer the beam to a

target angle  $\theta$ , the phase of each oscillator is tuned to satisfy  $\Delta\phi_i - \Delta\phi_{i-1} = \pi\sin\theta$ ,  $i = 1, 2, 3, \dots$ , within the precision provided by the 4-bit bank. The following figures show, for  $\theta = -60^\circ, -30^\circ, 0^\circ, 30^\circ, 60^\circ$ , the amplitude variations and phase errors for the 8 elements achieved in the simulation, and the resulting radiation patterns. These results demonstrate feasibility in the presence of the dominant static variation sources. Transient variation sources (noise, drift), though not considered here, can be addressed as needed via integrated calibration mechanisms as described in Supplementary Fig. 7.

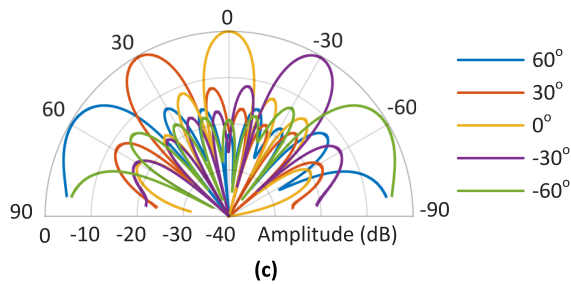

| Beam-steering angle ( $^\circ$ ) | Half power Beam width ( $^\circ$ ) | Sidelobe level (dB) |
|----------------------------------|------------------------------------|---------------------|
| 60                               | 29.0                               | -13.1               |
| 30                               | 14.6                               | -12.3               |
| 0                                | 12.6                               | -11.6               |
| -30                              | 14.7                               | -11.4               |
| -60                              | 29.1                               | -13.0               |

(d)

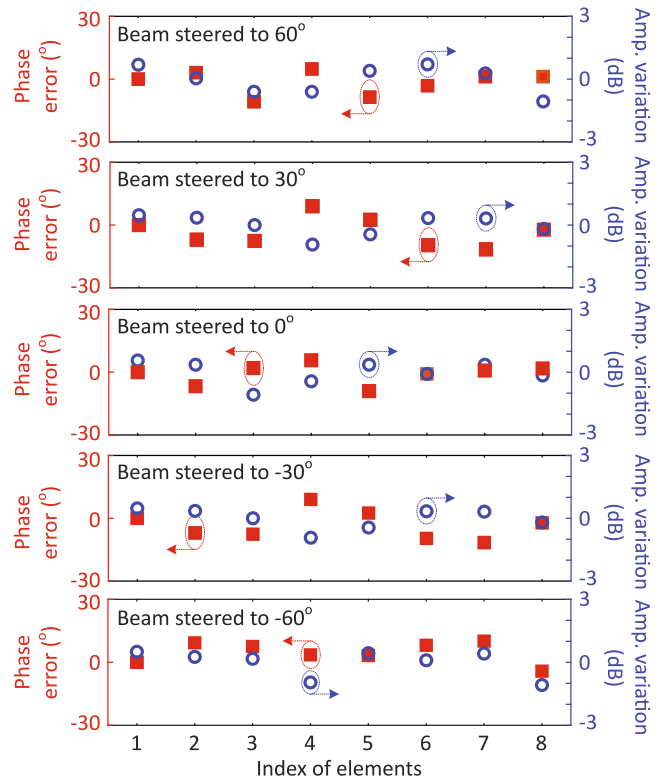

(e)

**(c) Simulated radiation patterns when the beam is steered to  $-60^\circ, -30^\circ, 0^\circ, 30^\circ, 60^\circ$ , respectively. (d) Summarized half power beam width and sidelobe level when the beam is steered to different angles. (e) The phase errors and amplitude variations in (c) when the beam is steered to different angles.**

## Supplementary Fig. 9

### Beam quality analysis.

The performance of the demonstrated LAE phased array, i.e., the beam error, is analyzed using Steinberg's tolerance theory<sup>6</sup> in "Principles of Aperture and Array System Design" Chapter 13. How the performance scales with the number of elements is also studied.

Phase quantization error and amplitude variation produce two first-order errors in the radiated beam: (A) main-beam gain error; and (B) beam pointing error.

#### (A) Main-beam gain error

The main-beam gain error  $(G - G_0)/G_0$  is taken from equation 13.8 on p. 306 of Steinberg:

$$\frac{G - G_0}{G_0} = |E[e^{j\delta\phi}]|^2 + \frac{1 - |E[e^{j\delta\phi}]|^2 + \sigma_a^2/a^2}{N} - 1$$

$G_0$  is the error-free main-beam gain,  $G$  is the gain with phase quantization error and amplitude variation,  $E$  stands for the expected value,  $\delta\phi$  is the phase quantization error (with rectangular distribution between  $[-\frac{\Delta\phi}{2}, \frac{\Delta\phi}{2}]$ , where  $\Delta\phi$  is the phase-tuning resolution),  $\sigma_a^2$  is the variance of the amplitude variation,  $a$  is the amplitude, and  $N$  is the number of elements. The two causes of gain error are (1) the phase quantization error, which arises from finite tuning resolution  $\Delta\phi$ ; and (2) the normalized amplitude variation  $\sigma_a/a$ . In Fig. 9a below, the expected value ( $E[(G - G_0)/G_0]$ ) of the gain error and its standard deviation ( $\sigma_{(G - G_0)/G_0}$ ) are plotted as a function of the two error sources ( $\Delta\phi$  and  $\sigma_a/a$ ) and the number of elements ( $N$ ).

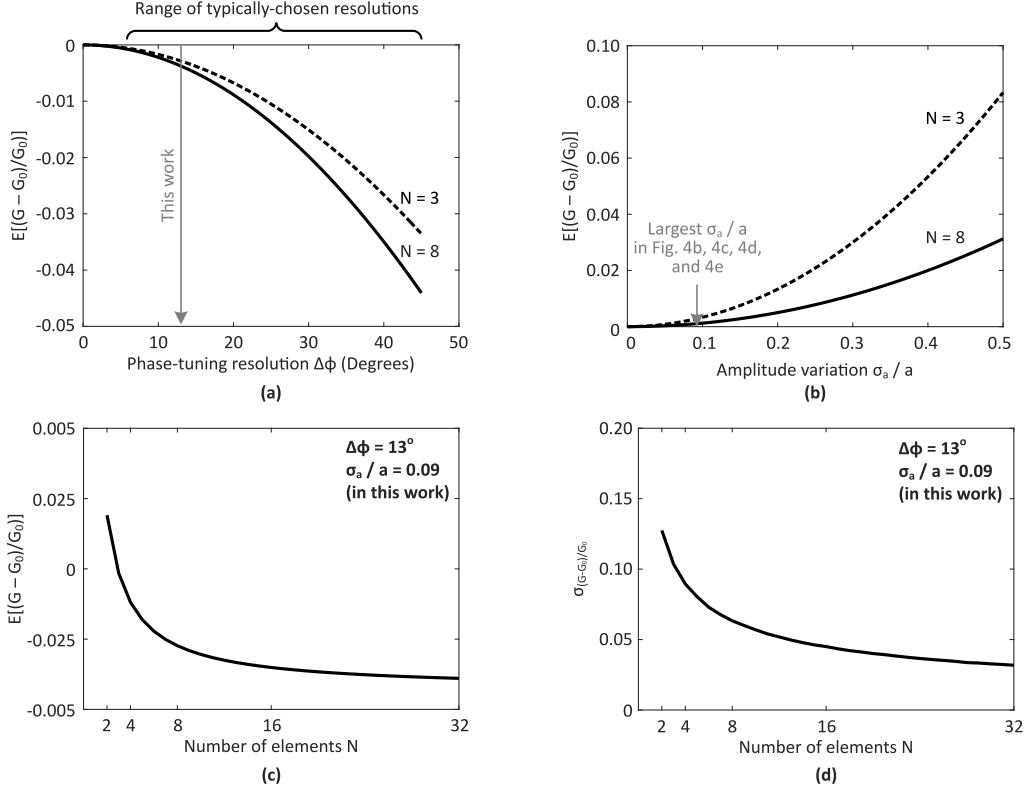

**Fig. 9(a): Main-beam gain error  $(G - G_0)/G_0$  vs. phase-tuning resolution  $\Delta\phi$ , amplitude variation  $\sigma_a/a$ , and the number of elements  $N$ .** (a) Expected value of gain error vs. phase-tuning resolution, for 3 and 8 elements. The grey arrow shows the resolution ( $13^\circ$ ) of our phased array. The bracket comprises the phase resolutions of published arrays<sup>7,8,9,10,11,12,13</sup> and commercial products<sup>14,15,16</sup>. (b) Expected value of gain error vs. amplitude variation, for 3 and 8 elements. The grey arrow shows the largest standard deviation of amplitude variation (0.09) in our antenna demonstration (manuscript Fig. 5b, 5c, 5d, and 5e). (c) Expected value of gain error vs. the number of elements, for the phase-tuning resolution ( $13^\circ$ ) and the largest standard deviation of amplitude variation (0.09) of our array. (d) Standard deviation of gain error vs. the number of elements, for the phase-tuning resolution ( $13^\circ$ ) and the largest standard deviation of amplitude variation (0.09) of our array.

## (B) Beam pointing error

The beam pointing error  $u$  originates only in the phase quantization error; it is not affected by amplitude variation. The phase quantization error  $\delta\phi$  translates to the beam

pointing error through a non-linear relationship that depends on the beam-steering angle  $\theta$ . Steinberg showed that for a linear phased array the expected value of  $u$  is zero, i.e.,  $E[u] = 0^\circ$ , because the quantization error  $\delta\phi$  has a rectangular distribution between  $[-\frac{\Delta\phi}{2}, \frac{\Delta\phi}{2}]$ , with a mean value of zero;  $\Delta\phi$  is the phase-tuning resolution. The standard deviation of the pointing error (i.e., RMS pointing error)  $\sigma_u$  is given by:

$$\sigma_u \approx \frac{\sqrt{3}}{\pi} \frac{\sigma_\phi}{\sqrt{N}} \cdot \Delta u \text{ (equation 13.32 on p. 312 of Steinberg).}$$

$\sigma_\phi$  is the standard deviation of the phase error ( $\sigma_\phi = \Delta\phi/\sqrt{12}$ ) and  $N$  is the number of elements.  $\Delta u$  is the beamwidth, estimated as  $\Delta u \approx \frac{\lambda}{Nd\cos\theta}$ , where  $\theta$  is the beam-steering angle and  $d = \lambda/2$  is the spacing of antenna elements.

In Fig. 9b below, the RMS beam pointing error  $\sigma_u$  is plotted in function of the beam-steering angle ( $\theta$ ), the phase-tuning resolution ( $\Delta\phi$ ), and the number of elements ( $N$ ).

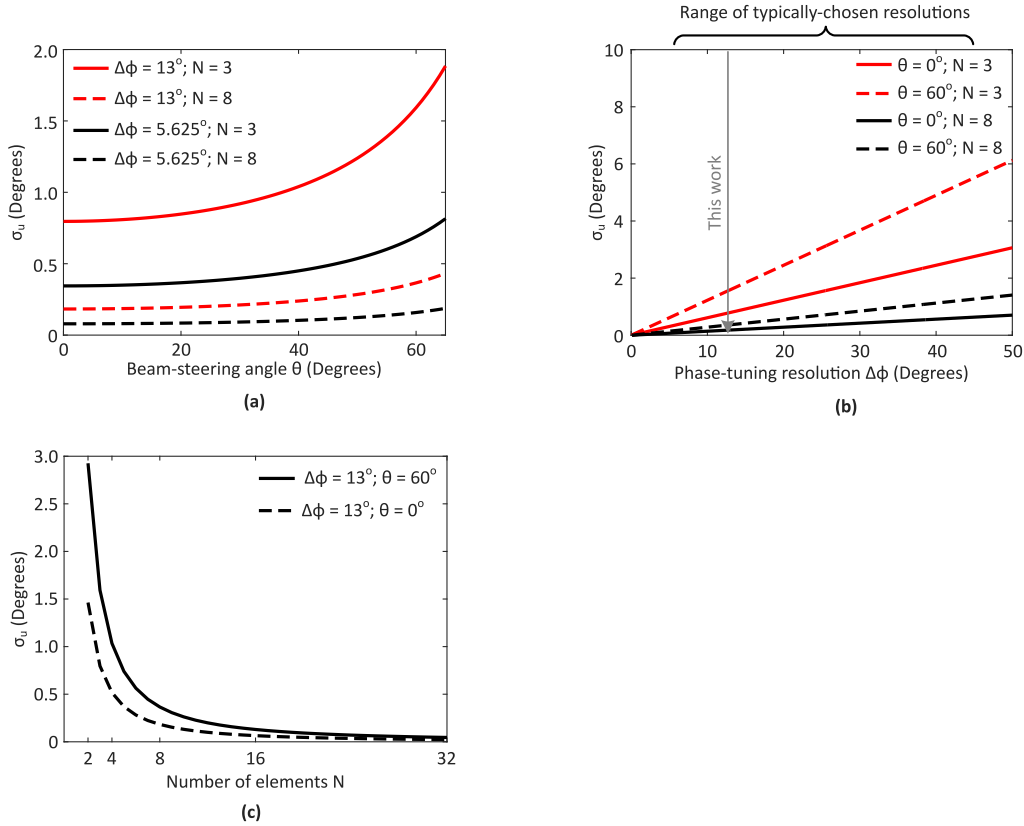

**Fig. 9(b): Beam RMS pointing error  $\sigma_u$  vs. beam-steering angle  $\theta$ , phase-tuning resolution  $\Delta\phi$ , and the number of elements  $N$ . (a) Beam RMS pointing error vs. steering**

angle, for two phase-tuning resolutions ( $\Delta\phi = 5.625^\circ$  and  $13^\circ$ ) and two numbers of elements ( $N = 3$  and  $8$ ). **(b)** Beam RMS pointing error vs. phase-tuning resolution, for two beam-steering angles ( $\theta = 0^\circ$  and  $60^\circ$ ) and two numbers of elements ( $N = 3$  and  $8$ ). The grey arrow points to the resolution ( $13^\circ$ ) of our phased array. The bracket comprises the typical phase resolutions of published arrays<sup>7,8,9,10,11,12,13</sup> and commercial products<sup>14,15,16</sup>. **(c)** Beam RMS pointing error vs. the number of elements, for different beam-steering angles ( $\theta = 0^\circ$  and  $60^\circ$ ) and the phase-tuning resolution ( $13^\circ$ ) of our array.



## Supplementary Table

|                                                   | ref <sup>14</sup>                | ref <sup>16</sup>        | ref <sup>17</sup>           | ref <sup>18</sup>                  | ref <sup>19</sup>                 | ref <sup>20</sup>              | ref <sup>21</sup> | ref <sup>22</sup> | This work |
|---------------------------------------------------|----------------------------------|--------------------------|-----------------------------|------------------------------------|-----------------------------------|--------------------------------|-------------------|-------------------|-----------|
| Demonstrated number of elements                   | 16                               | 16                       | 2 and 4                     | 32                                 | 16                                | 64 and 256                     | 4                 | 2                 | 3         |
| Technology                                        | discrete chips + antennas on PCB | CMOS chip + LAE antennas | CMOS chip + antennas on PCB | BiCMOS chips + antennas-in-package | BiCMOS chip + antennas-in-package | BiCMOS + sub-reticle stitching | Bi-CMOS           | CMOS              | LAE       |
| Flexible compatibility                            | No                               | Yes                      | No                          | No                                 | No                                | No                             | No                | No                | Yes       |
| Monolithic-integrable                             | No                               | No                       | No                          | No                                 | No                                | No                             | Yes               | Yes               | Yes       |
| Frequency (GHz)                                   | 7.5                              | 10                       | 24                          | 28                                 | 60                                | 60                             | 77                | 105.5             | 1         |
| Loss of EM signal in air at the frequency (dB/km) | <0.01                            | 0.01                     | 0.06                        | 0.06                               | 20                                | 20                             | 0.2               | 0.2               | <0.01     |
| D/λ achievable                                    | -                                | -                        | -                           | -                                  | -                                 | -                              | 7.3               | 10.0              | 11.2      |
| Near-field range ( $D^2/\lambda$ ) achievable (m) | -                                | -                        | -                           | -                                  | -                                 | -                              | 0.2               | 0.3               | 37.9      |

**Table I – Comparison of relevant metrics of the demonstrated system and previous demonstrations in other technologies.**

## References

1. Karanicolas, A. N. A 2.7-V 900-MHz CMOS LNA and mixer. *IEEE J. Solid-State Circuits* **31**, 1939–1944 (1996).
2. Zhou, S. & Chang, M. C. F. A CMOS Passive Mixer with Low Flicker Noise for Low-Power Direct-Conversion Receiver. *IEEE J. Solid-State Circuits* **40**, 1084–1093 (2005).
3. Fong, K. L. & Meyer, R. G. Monolithic RF Active Mixer Design. *IEEE Trans. Circuits Syst. II Analog Digit. Signal Process.* **46**, 231–239 (1999).
4. Hu, Y. *et al.* Large-Scale Sensing System Combining Large-Area Electronics and CMOS ICs for Structural-Health Monitoring. *IEEE J. Solid-State Circuits* **49**, 513–523 (2014).
5. Huang, L. *et al.* A Super-Regenerative Radio on Plastic based on Thin-Film Transistors and Antennas on Large Flexible Sheets for Distributed Communication Links. in *IEEE International Solid-State Circuits Conference* 458–459 (2013).
6. Steinberg, B. D. *Principles of Aperture and Array System Design: Including Random and Adaptive Arrays.* (Wiley, 1976).
7. Natarajan, A., Komijani, A. & Hajimiri, A. A Fully Integrated 24-GHz Phased-Array Transmitter in CMOS. *IEEE J. Solid-State Circuits* **40**, 2502–2514 (2005).
8. Kagan, T., Civi, O. A. & Demir, S. A Monolithic Phased Array Using 3-bit Distributed RF MEMS Phase Shifters. *IEEE Trans. Microw. Theory Tech.* **56**, 270–277 (2008).
9. Yeh, Y., Balboni, E. & Floyd, B. A 28-GHz Phased-Array Transceiver with Series-Fed Dual-Vector Distributed Beamforming. in *IEEE Radio Frequency Integrated Circuits Symposium (RFIC)* 65–68 (2017).
10. Kang, D. W., Kim, J. G., Min, B. W. & Rebeiz, G. M. Single and Four-Element Ka-Band Transmit/Receive Phased-Array Silicon RFICs With 5-bit Amplitude and Phase Control. *IEEE Trans. Microw. Theory Tech.* **57**, 3534–3543 (2009).
11. Kibaroglu, K., Sayginer, M. & Rebeiz, G. M. A 20 GHz Steerable Array Antenna Using 3-bit Dielectric Slab Phase Shifters on a Coplanar Waveguide. *Microw. Opt. Technol. Lett.* **49**, 3118–3122 (2007).
12. Li, S. & Rebeiz, G. M. A 134-149 GHz IF Beamforming Phased-Array Receiver Channel with 6.4-7.5 dB NF Using CMOS 45nm RFSOI. in *IEEE Radio Frequency Integrated Circuits Symposium (RFIC)* 103–106 (2020).
13. Guo, K., Zhang, Y. & Reynaert, P. A 0.53-THz Subharmonic Injection-Locked Phased Array With 63- $\mu$ W Radiated Power in 40-nm CMOS. *IEEE J. Solid-State Circuits* **54**, 380–391 (2019).
14. RENESAS F6121. Available at: <https://www.idt.com/us/en/products/rf-products/phased-array-beamformers/f6121-16-channel-dual-beam-rx-active-beamforming-ic-ku-band-satcom>.
15. Anokiwave AWMF-0135. Available at: <https://www.anokiwave.com/products/awmf-0135/index.html>.
16. OMMIC CGY2179UH/C1. Available at: [https://www.omic.com/product\\_corechips/?ref=CGY2179UH%2FC1](https://www.omic.com/product_corechips/?ref=CGY2179UH%2FC1).
